# Supplementary material
Source: MDPI journal article supplement (https://www.mdpi.com/2073-4433/12/4/513)
Supplement: s1 [file s1]

## **Supplementary Materials:**

# **Immediate and Delayed Meteorological Effects on COVID-19 Time-Varying Infectiousness in Tropical Cities**

**Xerxes Seposo <sup>1,\*</sup>, Chris Fook Sheng Ng <sup>1</sup> and Lina Madaniyazi <sup>1,2</sup>**

<sup>1</sup> School of Tropical Medicine and Global Health, Nagasaki University, Nagasaki 852-8521, Japan; chrisng@nagasaki-u.ac.jp (C.F.S.N.); lina.madaniyazi@nagasaki-u.ac.jp (L.M.)

<sup>2</sup> Department of Pediatric Infectious Diseases, Institute of Tropical Medicine, Nagasaki University, Nagasaki 852-8521, Japan

\* Correspondence: seposoxerxesoro@nagasaki-u.ac.jp

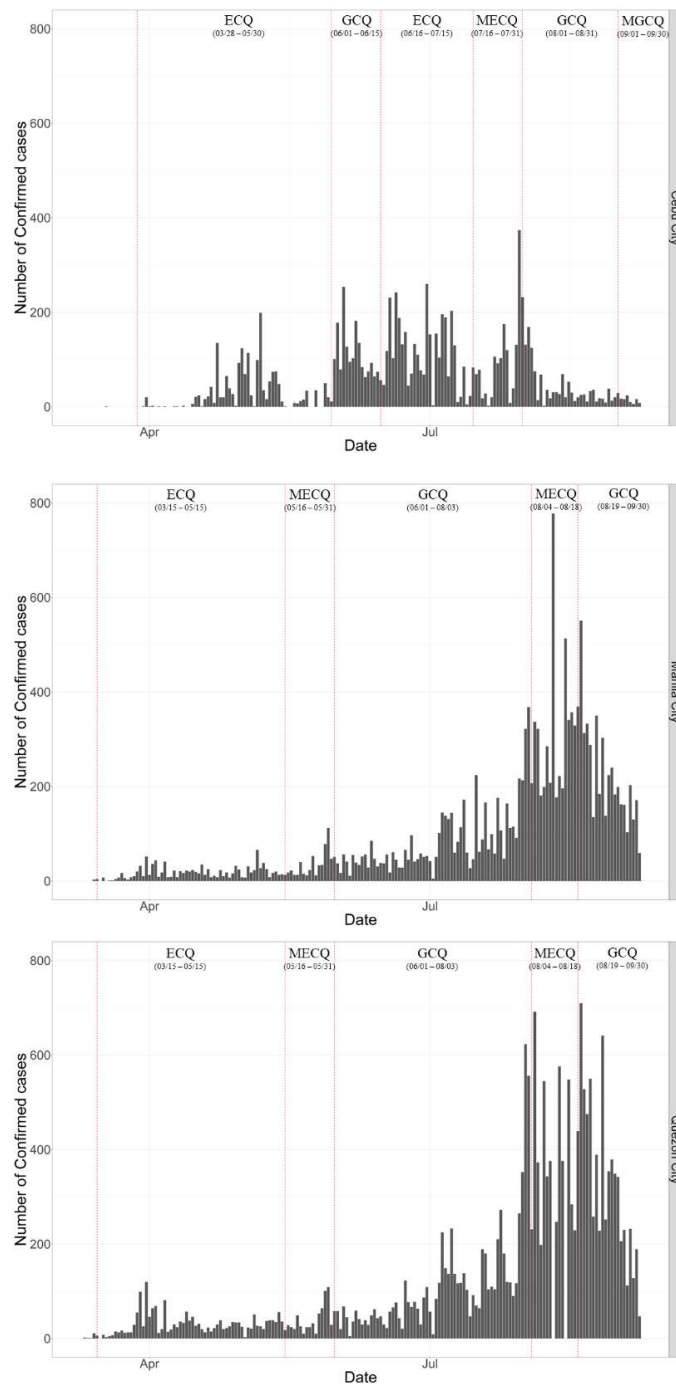

**Figure S1.** Timeline of community quarantine measures in the three major cities of the Philippines. Red vertical dotted lines indicate the inclusive period of community quarantine implementation. ECQ is enhanced community quarantine, the most stringent community quarantine measure, followed by MECQ, modified ECQ, with slightly relaxed activities. GCQ is the general community quarantine which has lesser restrictions than MECQ, and MGCQ, a modified GCQ which is intended to be a transition towards a new normal scenario. The period of the start and end of each community quarantine is located immediately below each acronym and are enclosed in parentheses.

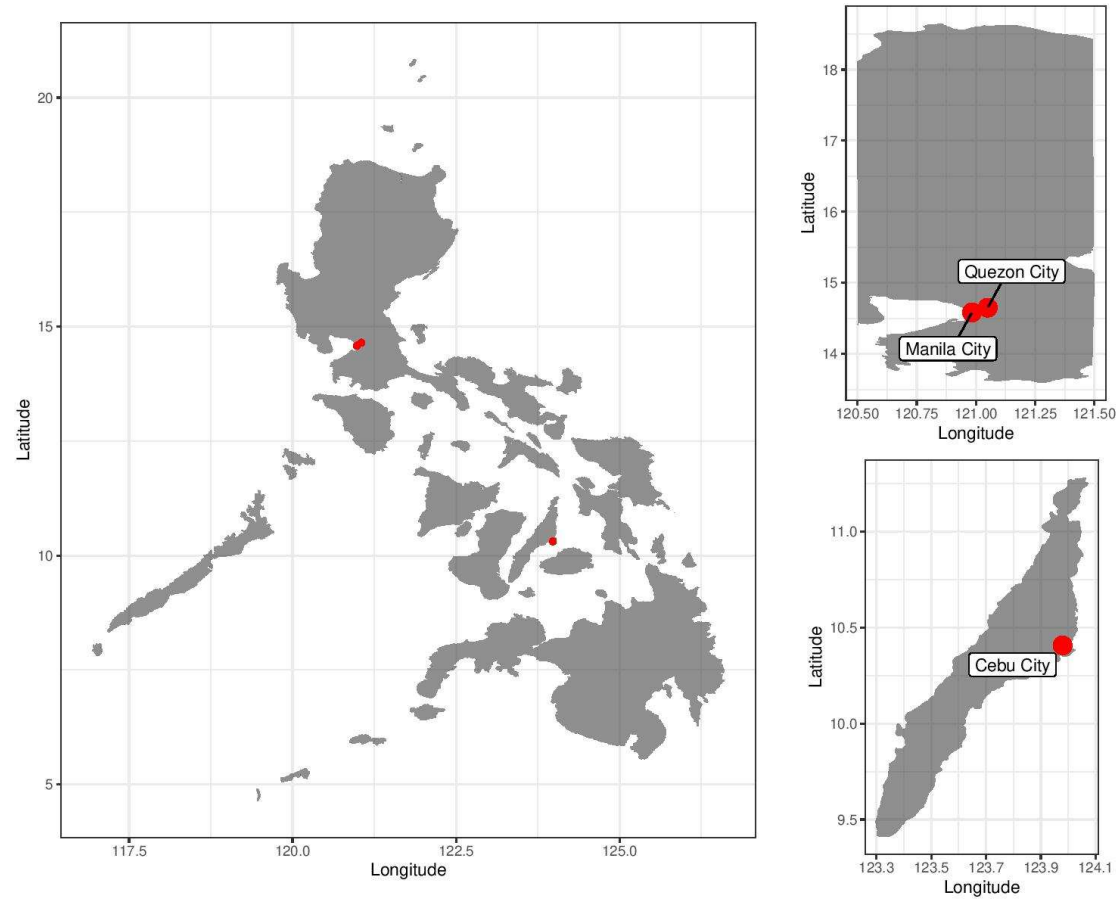

**Figure S2.** Geographical locations of the monitoring stations per city across the country (left) alongside zoomed-in locations for Manila and Quezon cities (right, upper) and Cebu city (right, lower). The cities of Manila and Quezon are located in the bigger cluster of islands, in Luzon, specifically in the National Capital Region. Whereas, Cebu city is located in the central part of the Philippines. The monitoring station of Manila city is located near the port area, whereas Quezon city is located at the heart of the city, in the Science Garden, while Cebu's monitoring station is near the Mactan Airport.

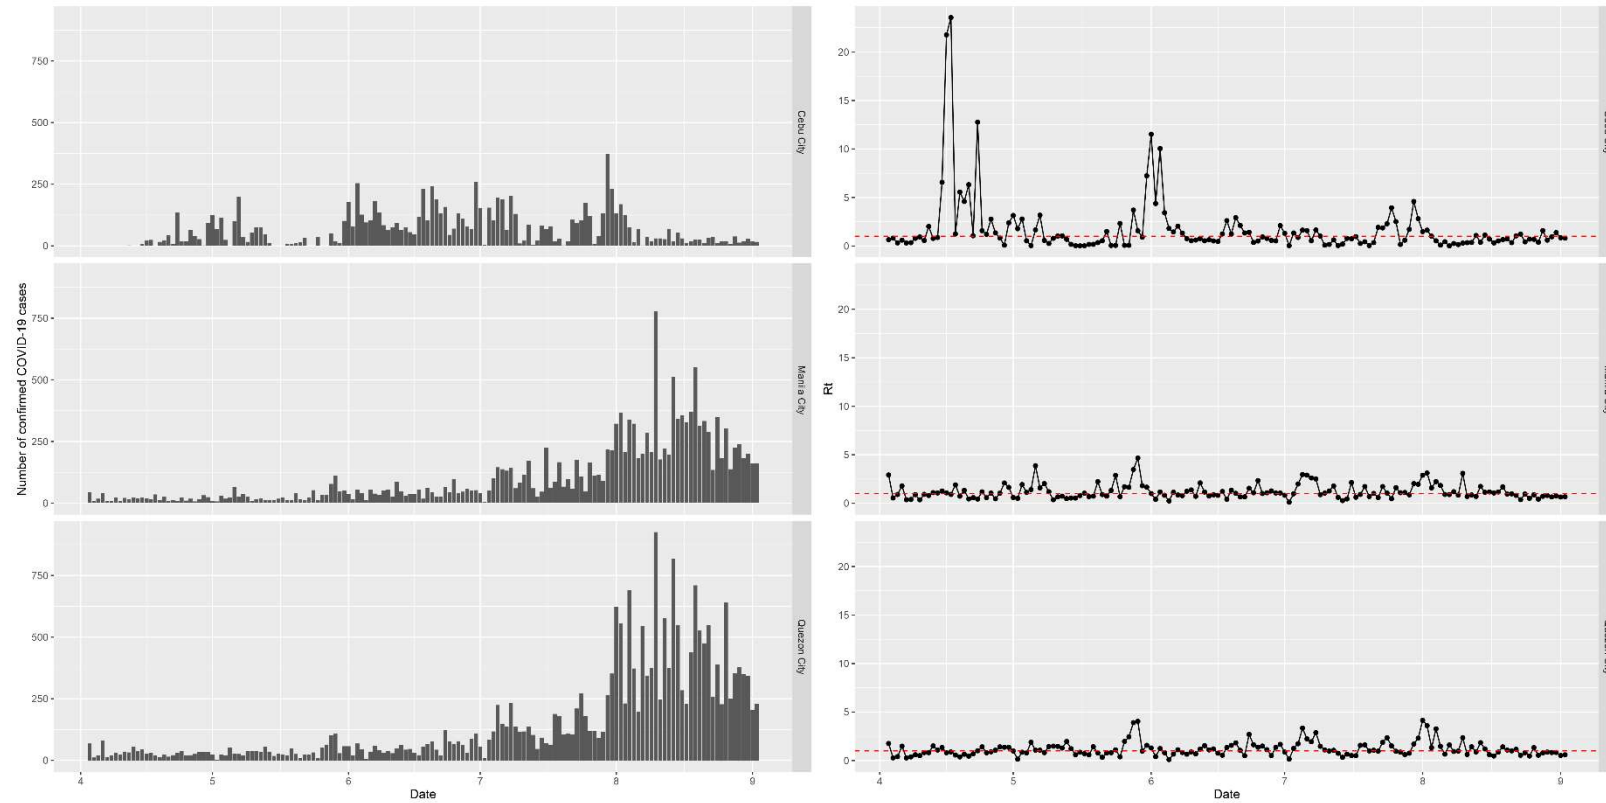

**Figure S3.** Time-varying  $R_t$  and daily number of COVID-19 cases in Cebu city (upper panel), Manila city (middle panel) and C) Quezon city (lower panel). Red horizontal dotted line for  $R_t$  panels (right panels, top to bottom) are drawn across when  $R_t$  is equal to 1. Daily number of COVID-19 case are located in the top to bottom right panels.

Daily number of RT-PCR tests were aggregated per health facility across the country. While some facilities have complete address, down to the city-level information, several health facilities did not have this information. In order to harmonize and identify the exact location of the health facilities, the raw/inputted address data of the health facilities were geocoded using the “*ggmap*” package in R statistical programming. The exact latitude and longitude of the facilities were extracted. Locations beyond the Philippine latitude and longitude specifications have been re-examined and re-geocoded. Instead of using the city-level number of tests for each city, given the complex nature of health facility referral system and the lack of clear geographical boundaries of health facility referrals, we assumed that the trend of regional/provincial RT-PCRs would reflect the same trend at the city-level. For Manila and Quezon cities, we used the trend of the National Capital Region (NCR), whereas for Cebu city, we utilized the trend from Cebu Province; geographical boundaries of the respective locations are depicted in Figure S4.

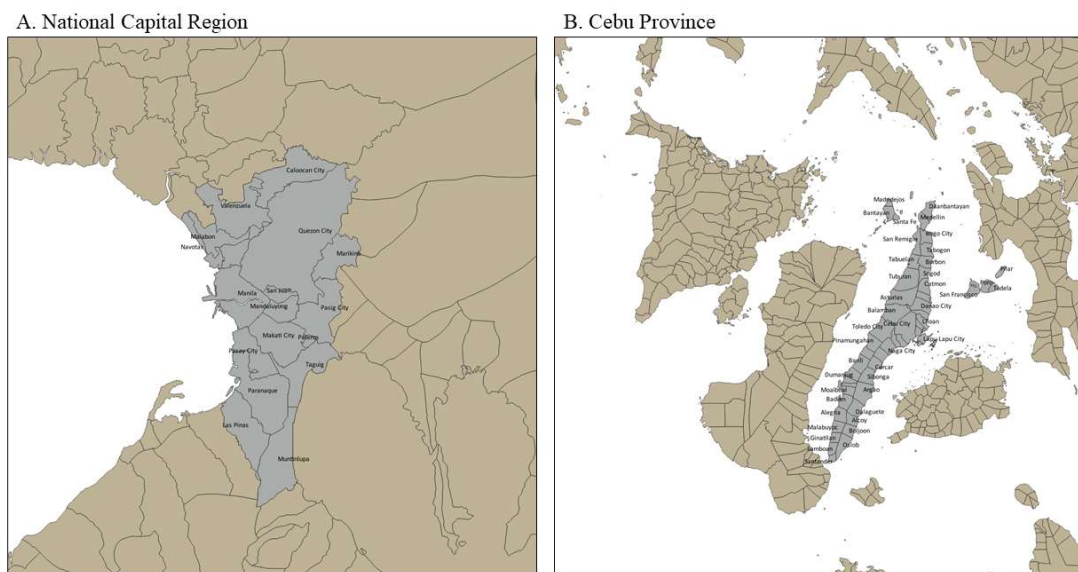

**Figure S4.** Geographical location and administrative boundaries of the National Capital Region (left) and Cebu Island (right).

The grey colored location is the area coverage for the National Capital Region (NCR) and Cebu Island. Overlayed in the colored regions are the administrative boundaries of the included cities and municipalities.

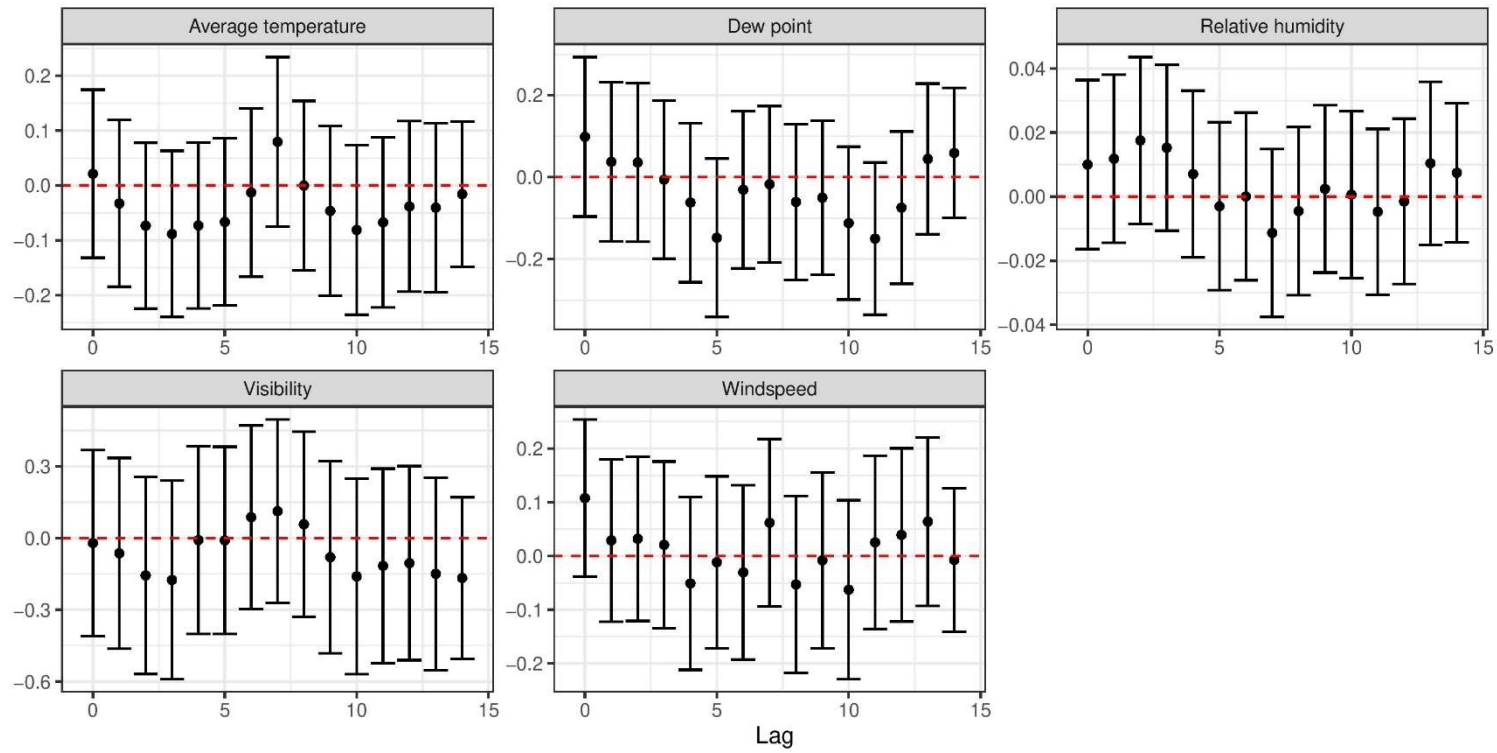

**Figure S5.** Lag-specific association of  $R_t$  and average temperature (leftmost, upper panel), dewpoint (middle, upper panel), relative humidity (rightmost, upper panel), visibility (leftmost, lower panel) and windspeed (middle, lower panel). The coefficients, in black, represent the statistically non-significant association with  $R_t$ , which cross the red horizontal dotted line (representing the null association).

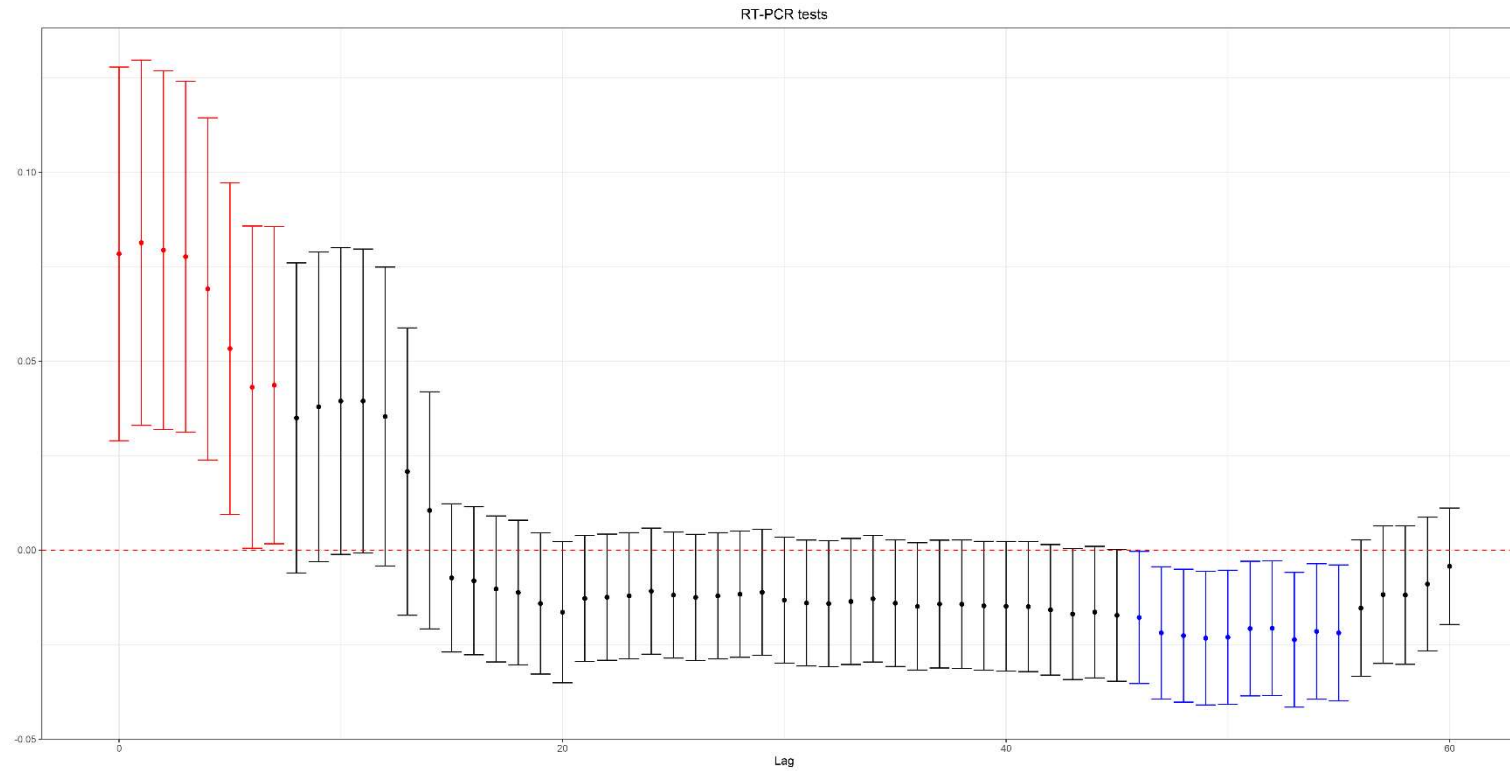

**Figure S6.** Extended lagged association of RT-PCR tests and  $R_t$ . Set at a 2-month (60 days) maximum lag, positive and statistically significant effects estimates are shown in red, whereas statistically negative associations are in blue. Red horizontal dotted line represents the null association.

**Table S1.** Characteristics of Top 5 cities in the Philippines with the most COVID-19 cases from 03 April 2020 to 02 September 2020.

| City          | Cumulative COVID-19 Cases | 2015 Population <sup>a</sup> | Availability of Weather Monitoring Station <sup>b</sup> | COVID-19 Cumulative Incidence (per 1,000 Population) |
|---------------|---------------------------|------------------------------|---------------------------------------------------------|------------------------------------------------------|
| Quezon city   | 23,708                    | 2,936,116                    | +                                                       | 8                                                    |
| Manila city   | 16,722                    | 1,780,148                    | +                                                       | 9                                                    |
| Cebu city     | 9,804                     | 922,611                      | +                                                       | 11                                                   |
| Caloocan city | 8,949                     | 1,583,978                    | -                                                       | 6                                                    |
| Makati city   | 8,176                     | 582,602                      | -                                                       | 14                                                   |

<sup>a</sup>2015 Census of Population<sup>b</sup>National Oceanic and Atmospheric Administration (NOAA) weather monitoring station [presence (+)/ absence (-)]**Table S2.** Definition of community quarantine classifications.

| Community quarantine classification                  | CQ Level | Definition <sup>1</sup>                                                                                                                                                                                                                                                                                                                                                                          |
|------------------------------------------------------|----------|--------------------------------------------------------------------------------------------------------------------------------------------------------------------------------------------------------------------------------------------------------------------------------------------------------------------------------------------------------------------------------------------------|
| <b>Enhanced Community Quarantine (ECQ)</b>           | 4        | <i>“refers to the implementation of temporary measures imposing <u>stringent limitations</u> on movement and transportation of people, strict regulation of operating industries, provision of food and essential services, and heightened presence of uniformed personnel to enforce community quarantine protocols”</i>                                                                        |
| <b>Modified Enhanced Community Quarantine (MECQ)</b> | 3        | <i>“refers to the <u>transition phase between ECQ and GCQ</u>, when the following <u>temporary measures are relaxed</u> and become less necessary: stringent limits on movement and transportation of people, strict regulation of operating industries, provision of food and essential services, and heightened presence of uniformed personnel to enforce community quarantine protocols”</i> |
| <b>General Community Quarantine (GCQ)</b>            | 2        | <i>“refers to the implementation of <u>temporary measures limiting movement and transportation</u>, regulation of operating industries, and presence of uniformed personnel to enforce community quarantine protocols”</i>                                                                                                                                                                       |
| <b>Modified General Community Quarantine (MGCQ)</b>  | 1        | <i>“refers to <u>the transition phase between GCQ and the New Normal</u>, when the following temporary measures are relaxed and become less necessary: limiting movement and transportation, the regulation of operating industries, and the presence of uniformed personnel to enforce community quarantine protocols”</i>                                                                      |

<sup>1</sup>OMNIBUS GUIDELINES ON THE IMPLEMENTATION OF COMMUNITY QUARANTINE IN THE PHILIPPINES with Amendments as of 08 October 2020



**Table S3.** Stepwise regression via backward elimination results.

| Model                           | Covariate            | $\beta$  | SE      | p-value |
|---------------------------------|----------------------|----------|---------|---------|
| Model 1<br>(Initial Full Model) | Air Pressure - Lag 0 | 2.36247  | 1.21806 | 0.05244 |
|                                 | Air Pressure - Lag 1 | 0.53617  | 1.77271 | 0.76230 |
|                                 | Air Pressure - Lag 2 | −0.08887 | 1.83028 | 0.96127 |
|                                 | Air Pressure - Lag 3 | 1.10942  | 1.83642 | 0.54576 |
|                                 | Air Pressure - Lag 4 | −0.46479 | 1.83515 | 0.80006 |
|                                 | Air Pressure - Lag 5 | 0.16214  | 1.87781 | 0.93119 |
|                                 | Air Pressure - Lag 6 | 0.49013  | 1.89564 | 0.79598 |
|                                 | Air Pressure - Lag 7 | 1.70331  | 1.83031 | 0.35205 |
|                                 | Air Pressure - Lag 8 | 0.38506  | 1.28620 | 0.76465 |
|                                 | RT-PCR tests - Lag 0 | 0.08072  | 0.06767 | 0.23289 |
|                                 | RT-PCR tests - Lag 1 | 0.05413  | 0.07885 | 0.49242 |
|                                 | RT-PCR tests - Lag 2 | −0.00681 | 0.08124 | 0.93318 |
|                                 | RT-PCR tests - Lag 3 | 0.02874  | 0.08103 | 0.72284 |
|                                 | RT-PCR tests - Lag 4 | 0.05667  | 0.08033 | 0.48054 |
|                                 | RT-PCR tests - Lag 5 | −0.00403 | 0.08034 | 0.95995 |
|                                 | RT-PCR tests - Lag 6 | −0.01234 | 0.07939 | 0.87651 |
|                                 | RT-PCR tests - Lag 7 | −0.02977 | 0.06452 | 0.64450 |
|                                 | CQ 1:Time            | −0.01324 | 0.00855 | 0.12142 |
|                                 | CQ 2:Time            | −0.01679 | 0.00464 | 0.00030 |
|                                 | CQ 3:Time            | −0.01262 | 0.00543 | 0.02010 |
|                                 | CQ 4:Time            | −0.02768 | 0.00662 | 0.00003 |
| Model 2                         | Air Pressure - Lag 0 | 2.32075  | 1.16636 | 0.04662 |
|                                 | Air Pressure - Lag 1 | 0.41952  | 1.30015 | 0.74694 |
|                                 | Air Pressure - Lag 3 | 1.17031  | 1.35561 | 0.38797 |
|                                 | Air Pressure - Lag 4 | −0.43311 | 1.80647 | 0.81052 |
|                                 | Air Pressure - Lag 5 | −0.01124 | 1.83777 | 0.99512 |
|                                 | Air Pressure - Lag 6 | 0.73016  | 1.81692 | 0.68778 |
|                                 | Air Pressure - Lag 7 | 1.31687  | 1.74540 | 0.45056 |
|                                 | Air Pressure - Lag 8 | 0.60224  | 1.25705 | 0.63187 |
|                                 | RT-PCR tests - Lag 0 | 0.08127  | 0.06677 | 0.22357 |
|                                 | RT-PCR tests - Lag 1 | 0.05600  | 0.07735 | 0.46907 |
|                                 | RT-PCR tests - Lag 2 | −0.01107 | 0.08059 | 0.89078 |
|                                 | RT-PCR tests - Lag 3 | 0.03168  | 0.08072 | 0.69466 |
|                                 | RT-PCR tests - Lag 4 | 0.05614  | 0.08004 | 0.48303 |
|                                 | RT-PCR tests - Lag 5 | −0.00554 | 0.08002 | 0.94484 |
|                                 | RT-PCR tests - Lag 6 | −0.01245 | 0.07864 | 0.87415 |
|                                 | RT-PCR tests - Lag 7 | −0.02908 | 0.06368 | 0.64789 |
|                                 | CQ 1:Time            | −0.01330 | 0.00851 | 0.11811 |

|         |                      |          |         |         |
|---------|----------------------|----------|---------|---------|
| Model 3 | CQ 2:Time            | −0.01667 | 0.00461 | 0.00030 |
|         | CQ 3:Time            | −0.01260 | 0.00539 | 0.01937 |
|         | CQ 4:Time            | −0.02765 | 0.00659 | 0.00003 |
|         | Air Pressure - Lag 0 | 2.32891  | 1.15451 | 0.04367 |
|         | Air Pressure - Lag 1 | 0.45021  | 1.27429 | 0.72386 |
|         | Air Pressure - Lag 3 | 1.13070  | 1.28696 | 0.37963 |
|         | Air Pressure - Lag 4 | −0.42426 | 1.32540 | 0.74889 |
|         | Air Pressure - Lag 6 | 0.61649  | 1.36192 | 0.65079 |
|         | Air Pressure - Lag 7 | 1.34959  | 1.70606 | 0.42891 |
|         | Air Pressure - Lag 8 | 0.55720  | 1.24572 | 0.65466 |
|         | RT-PCR tests - Lag 0 | 0.08709  | 0.06591 | 0.18638 |
|         | RT-PCR tests - Lag 1 | 0.05011  | 0.07646 | 0.51225 |
|         | RT-PCR tests - Lag 2 | −0.00720 | 0.07948 | 0.92778 |
|         | RT-PCR tests - Lag 3 | 0.02963  | 0.07926 | 0.70852 |
|         | RT-PCR tests - Lag 4 | 0.04991  | 0.07899 | 0.52747 |
|         | RT-PCR tests - Lag 5 | −0.00325 | 0.07934 | 0.96733 |
|         | RT-PCR tests - Lag 6 | −0.01088 | 0.07792 | 0.88891 |
|         | RT-PCR tests - Lag 7 | −0.03001 | 0.06328 | 0.63536 |
|         | CQ 1:Time            | −0.01353 | 0.00847 | 0.11003 |
|         | CQ 2:Time            | −0.01684 | 0.00456 | 0.00022 |
| Model 4 | CQ 3:Time            | −0.01317 | 0.00531 | 0.01312 |
|         | CQ 4:Time            | −0.02799 | 0.00655 | 0.00002 |
|         | Air Pressure - Lag 0 | 2.33371  | 1.14701 | 0.04189 |
|         | Air Pressure - Lag 1 | 0.44596  | 1.26834 | 0.72513 |
|         | Air Pressure - Lag 3 | 1.12854  | 1.28414 | 0.37949 |
|         | Air Pressure - Lag 4 | −0.42129 | 1.32162 | 0.74990 |
|         | Air Pressure - Lag 6 | 0.61450  | 1.35921 | 0.65120 |
|         | Air Pressure - Lag 7 | 1.36210  | 1.67623 | 0.41645 |
|         | Air Pressure - Lag 8 | 0.54658  | 1.21681 | 0.65329 |
|         | RT-PCR tests - Lag 0 | 0.08686  | 0.06558 | 0.18535 |
|         | RT-PCR tests - Lag 1 | 0.05017  | 0.07634 | 0.51101 |
|         | RT-PCR tests - Lag 2 | −0.00686 | 0.07893 | 0.93071 |
|         | RT-PCR tests - Lag 3 | 0.02895  | 0.07741 | 0.70839 |
|         | RT-PCR tests - Lag 4 | 0.04883  | 0.07431 | 0.51115 |
|         | RT-PCR tests - Lag 6 | −0.01199 | 0.07300 | 0.86954 |
|         | RT-PCR tests - Lag 7 | −0.03058 | 0.06162 | 0.61968 |
|         | CQ 1:Time            | −0.01352 | 0.00845 | 0.10966 |
|         | CQ 2:Time            | −0.01683 | 0.00455 | 0.00022 |
|         | CQ 3:Time            | −0.01317 | 0.00530 | 0.01299 |
|         | CQ 4:Time            | −0.02799 | 0.00654 | 0.00002 |

|         |                      |          |         |         |
|---------|----------------------|----------|---------|---------|
| Model 5 | Air Pressure - Lag 0 | 2.32717  | 1.14301 | 0.04175 |
|         | Air Pressure - Lag 1 | 0.44968  | 1.26592 | 0.72242 |
|         | Air Pressure - Lag 3 | 1.12723  | 1.28233 | 0.37938 |
|         | Air Pressure - Lag 4 | −0.40806 | 1.31108 | 0.75562 |
|         | Air Pressure - Lag 6 | 0.60196  | 1.34973 | 0.65561 |
|         | Air Pressure - Lag 7 | 1.37012  | 1.67145 | 0.41238 |
|         | Air Pressure - Lag 8 | 0.54070  | 1.21330 | 0.65586 |
|         | RT-PCR tests - Lag 0 | 0.08571  | 0.06413 | 0.18142 |
|         | RT-PCR tests - Lag 1 | 0.04788  | 0.07153 | 0.50325 |
|         | RT-PCR tests - Lag 3 | 0.02671  | 0.07290 | 0.71404 |
|         | RT-PCR tests - Lag 4 | 0.04770  | 0.07307 | 0.51391 |
|         | RT-PCR tests - Lag 6 | −0.01173 | 0.07285 | 0.87204 |
|         | RT-PCR tests - Lag 7 | −0.03085 | 0.06146 | 0.61563 |
|         | CQ 1:Time            | −0.01353 | 0.00844 | 0.10884 |
|         | CQ 2:Time            | −0.01684 | 0.00455 | 0.00021 |
|         | CQ 3:Time            | −0.01318 | 0.00530 | 0.01286 |
|         | CQ 4:Time            | −0.02799 | 0.00653 | 0.00002 |
| Model 6 | Air Pressure - Lag 0 | 2.31756  | 1.13996 | 0.04205 |
|         | Air Pressure - Lag 1 | 0.47345  | 1.25564 | 0.70613 |
|         | Air Pressure - Lag 3 | 1.11381  | 1.27795 | 0.38345 |
|         | Air Pressure - Lag 4 | −0.40810 | 1.30936 | 0.75529 |
|         | Air Pressure - Lag 6 | 0.60736  | 1.34755 | 0.65219 |
|         | Air Pressure - Lag 7 | 1.37765  | 1.66861 | 0.40901 |
|         | Air Pressure - Lag 8 | 0.54866  | 1.21071 | 0.65043 |
|         | RT-PCR tests - Lag 0 | 0.08565  | 0.06405 | 0.18114 |
|         | RT-PCR tests - Lag 1 | 0.04735  | 0.07136 | 0.50698 |
|         | RT-PCR tests - Lag 3 | 0.02722  | 0.07274 | 0.70827 |
|         | RT-PCR tests - Lag 4 | 0.04294  | 0.06674 | 0.51999 |
|         | RT-PCR tests - Lag 7 | −0.03757 | 0.04509 | 0.40465 |
|         | CQ 1:Time            | −0.01350 | 0.00843 | 0.10911 |
|         | CQ 2:Time            | −0.01680 | 0.00453 | 0.00021 |
|         | CQ 3:Time            | −0.01311 | 0.00528 | 0.01293 |
|         | CQ 4:Time            | −0.02793 | 0.00651 | 0.00002 |
| Model 7 | Air Pressure - Lag 0 | 2.30294  | 1.11874 | 0.03954 |
|         | Air Pressure - Lag 1 | 0.54885  | 1.22464 | 0.65403 |
|         | Air Pressure - Lag 3 | 0.76194  | 0.84537 | 0.36742 |
|         | Air Pressure - Lag 6 | 0.43203  | 1.20598 | 0.72017 |
|         | Air Pressure - Lag 7 | 1.33290  | 1.58552 | 0.40053 |
|         | Air Pressure - Lag 8 | 0.57776  | 1.16970 | 0.62135 |
|         | RT-PCR tests - Lag 0 | 0.08288  | 0.06358 | 0.19240 |

|          |                      |          |         |         |
|----------|----------------------|----------|---------|---------|
| Model 8  | RT-PCR tests - Lag 1 | 0.04950  | 0.07040 | 0.48199 |
|          | RT-PCR tests - Lag 3 | 0.02368  | 0.07162 | 0.74091 |
|          | RT-PCR tests - Lag 4 | 0.04681  | 0.06613 | 0.47907 |
|          | RT-PCR tests - Lag 7 | −0.03927 | 0.04484 | 0.38107 |
|          | CQ 1:Time            | −0.01369 | 0.00838 | 0.10238 |
|          | CQ 2:Time            | −0.01681 | 0.00449 | 0.00018 |
|          | CQ 3:Time            | −0.01351 | 0.00523 | 0.00979 |
|          | CQ 4:Time            | −0.02809 | 0.00648 | 0.00001 |
|          | Air Pressure - Lag 0 | 2.31481  | 1.11685 | 0.03821 |
|          | Air Pressure - Lag 1 | 0.55475  | 1.22308 | 0.65014 |
|          | Air Pressure - Lag 3 | 0.72427  | 0.83668 | 0.38668 |
|          | Air Pressure - Lag 6 | 0.44804  | 1.20361 | 0.70971 |
|          | Air Pressure - Lag 7 | 1.34172  | 1.58344 | 0.39680 |
|          | Air Pressure - Lag 8 | 0.58023  | 1.16831 | 0.61944 |
|          | RT-PCR tests - Lag 0 | 0.08303  | 0.06350 | 0.19101 |
|          | RT-PCR tests - Lag 1 | 0.05765  | 0.06587 | 0.38145 |
|          | RT-PCR tests - Lag 4 | 0.06004  | 0.05255 | 0.25324 |
|          | RT-PCR tests - Lag 7 | −0.03752 | 0.04447 | 0.39880 |
|          | CQ 1:Time            | −0.01363 | 0.00837 | 0.10331 |
|          | CQ 2:Time            | −0.01674 | 0.00448 | 0.00019 |
| Model 9  | CQ 3:Time            | −0.01344 | 0.00522 | 0.01003 |
|          | CQ 4:Time            | −0.02800 | 0.00646 | 0.00001 |
|          | Air Pressure - Lag 0 | 2.27428  | 1.10505 | 0.03958 |
|          | Air Pressure - Lag 1 | 0.63062  | 1.20939 | 0.60206 |
|          | Air Pressure - Lag 3 | 0.76069  | 0.82586 | 0.35700 |
|          | Air Pressure - Lag 7 | 1.72937  | 1.10755 | 0.11842 |
|          | Air Pressure - Lag 8 | 0.46861  | 1.13141 | 0.67874 |
|          | RT-PCR tests - Lag 0 | 0.08378  | 0.06254 | 0.18041 |
|          | RT-PCR tests - Lag 1 | 0.06137  | 0.06472 | 0.34299 |
|          | RT-PCR tests - Lag 4 | 0.05463  | 0.05074 | 0.28164 |
| Model 10 | RT-PCR tests - Lag 7 | −0.03649 | 0.04414 | 0.40838 |
|          | CQ 1:Time            | −0.01375 | 0.00832 | 0.09824 |
|          | CQ 2:Time            | −0.01691 | 0.00443 | 0.00014 |
|          | CQ 3:Time            | −0.01361 | 0.00518 | 0.00855 |
|          | CQ 4:Time            | −0.02819 | 0.00642 | 0.00001 |
|          | Air Pressure - Lag 0 | 2.12447  | 1.09720 | 0.05283 |
|          | Air Pressure - Lag 1 | 0.39821  | 1.19078 | 0.73807 |
|          | Air Pressure - Lag 3 | 0.99154  | 0.81799 | 0.22545 |
|          | Air Pressure - Lag 7 | 1.91031  | 0.71436 | 0.00749 |
|          | RT-PCR tests - Lag 0 | 0.07317  | 0.06231 | 0.24026 |

|          |                      |          |         |         |
|----------|----------------------|----------|---------|---------|
| Model 11 | RT-PCR tests - Lag 1 | 0.06790  | 0.06448 | 0.29229 |
|          | RT-PCR tests - Lag 4 | 0.05400  | 0.05010 | 0.28111 |
|          | RT-PCR tests - Lag 7 | −0.03965 | 0.04320 | 0.35865 |
|          | CQ 1:Time            | −0.01304 | 0.00831 | 0.11634 |
|          | CQ 2:Time            | −0.01651 | 0.00434 | 0.00014 |
|          | CQ 3:Time            | −0.01329 | 0.00504 | 0.00836 |
|          | CQ 4:Time            | −0.02731 | 0.00632 | 0.00002 |
|          | Air Pressure - Lag 0 | 2.35975  | 0.71899 | 0.00103 |
|          | Air Pressure - Lag 3 | 1.04757  | 0.74405 | 0.15916 |
|          | Air Pressure - Lag 7 | 1.95802  | 0.70912 | 0.00576 |
|          | RT-PCR tests - Lag 0 | 0.07458  | 0.06166 | 0.22648 |
|          | RT-PCR tests - Lag 1 | 0.06465  | 0.06374 | 0.31052 |
|          | RT-PCR tests - Lag 4 | 0.05626  | 0.04964 | 0.25708 |
|          | RT-PCR tests - Lag 7 | −0.03960 | 0.04292 | 0.35616 |
|          | CQ 1:Time            | −0.01326 | 0.00826 | 0.10876 |
|          | CQ 2:Time            | −0.01667 | 0.00430 | 0.00011 |
| Model 12 | CQ 3:Time            | −0.01349 | 0.00499 | 0.00690 |
|          | CQ 4:Time            | −0.02737 | 0.00629 | 0.00001 |
|          | Air Pressure - Lag 0 | 2.30540  | 0.71644 | 0.00129 |
|          | Air Pressure - Lag 3 | 1.00801  | 0.74269 | 0.17470 |
|          | Air Pressure - Lag 7 | 2.16579  | 0.67231 | 0.00128 |
|          | RT-PCR tests - Lag 0 | 0.06968  | 0.06142 | 0.25661 |
|          | RT-PCR tests - Lag 1 | 0.05852  | 0.06339 | 0.35593 |
|          | RT-PCR tests - Lag 4 | 0.03084  | 0.04129 | 0.45509 |
|          | CQ 1:Time            | −0.01298 | 0.00826 | 0.11610 |
|          | CQ 2:Time            | −0.01620 | 0.00427 | 0.00015 |
|          | CQ 3:Time            | −0.01303 | 0.00497 | 0.00872 |
|          | CQ 4:Time            | −0.02664 | 0.00624 | 0.00002 |
|          | Air Pressure - Lag 0 | 2.33492  | 0.71499 | 0.00109 |
|          | Air Pressure - Lag 3 | 0.93678  | 0.73620 | 0.20321 |
|          | Air Pressure - Lag 7 | 2.08578  | 0.66329 | 0.00166 |
| Model 13 | RT-PCR tests - Lag 0 | 0.07788  | 0.06036 | 0.19697 |
|          | RT-PCR tests - Lag 1 | 0.07644  | 0.05859 | 0.19199 |
|          | CQ 1:Time            | −0.01335 | 0.00824 | 0.10506 |
|          | CQ 2:Time            | −0.01624 | 0.00427 | 0.00014 |
|          | CQ 3:Time            | −0.01317 | 0.00496 | 0.00791 |
|          | CQ 4:Time            | −0.02685 | 0.00622 | 0.00002 |
| Model 14 | Air Pressure - Lag 0 | 2.58824  | 0.68417 | 0.00015 |
|          | Air Pressure - Lag 7 | 2.29139  | 0.63572 | 0.00031 |
|          | RT-PCR tests - Lag 0 | 0.09497  | 0.05891 | 0.10692 |

|                           |                      |          |         |         |
|---------------------------|----------------------|----------|---------|---------|
| Model 15<br>(Final Model) | RT-PCR tests - Lag 1 | 0.05698  | 0.05673 | 0.31520 |
|                           | CQ 1:Time            | −0.01535 | 0.00808 | 0.05729 |
|                           | CQ 2:Time            | −0.01713 | 0.00419 | 0.00004 |
|                           | CQ 3:Time            | −0.01433 | 0.00488 | 0.00332 |
|                           | CQ 4:Time            | −0.02783 | 0.00617 | 0.00001 |
|                           | Air Pressure - Lag 0 | 2.59425  | 0.68426 | 0.00015 |
|                           | Air Pressure - Lag 7 | 2.25998  | 0.63500 | 0.00037 |
|                           | RT-PCR tests - Lag 0 | 0.14491  | 0.03068 | 0.00000 |
|                           | CQ 1:Time            | −0.01496 | 0.00807 | 0.06366 |
|                           | CQ 2:Time            | −0.01671 | 0.00417 | 0.00006 |
|                           | CQ 3:Time            | −0.01385 | 0.00486 | 0.00437 |
|                           | CQ 4:Time            | −0.02743 | 0.00616 | 0.00001 |

---

RT-PCR = reverse transcriptase polymerase chain reaction; CQ = community quarantine; CQ:Time = interaction of CQ with time; ;CQ = 1 (Modified General Community Quarantine); CQ = 2 (General Community Quarantine); CQ = 3 (Modified Enhanced Community Quarantine); CQ = 4 (Enhanced Community Quarantine);  $\beta$ = beta coefficient; SE = standard error
